# Supplementary material for: Comparative genomic analysis of Bacillus paralicheniformis MDJK30 with its closely related species reveals an evolutionary relationship between B. paralicheniformis and B. licheniformis
Source: BMC Genomics. 2019 Apr 11;20:283. doi: 10.1186/s12864-019-5646-9 (PMC6458615; doi:10.1186/s12864-019-5646-9)
Supplement: Supplementary file 4 — Table S2. Genetic characteristics of strains in the current research. (XLSX 15 kb) [file 12864_2019_5646_MOESM4_ESM.xlsx]

## Sheet: strains used in Figure3 
Strain name	accession number	ORF number	GC (%)	genome size(Mb)
B. licheniformis SRCM100115	GCA_001662975.1	4196	0.472025	4.03836
B. licheniformis 5NAP23	GCA_000948275.1	4208	0.472072	4.08025
B. licheniformis YNP5-TSU	GCA_001896295.1	4639	0.465506	4.43948
B. licheniformis B4090_201601	GCA_001587285.1	4736	0.470366	4.20375
B. licheniformis YNP2-TSU	GCA_001896285.1	4971	0.45992	4.66382
B. licheniformis YNP3-TSU	GCA_001896305.1	4627	0.463392	4.41993
B. licheniformis SCDB_34	GCA_002074115.1	4630	0.465854	4.37498
B. licheniformis RE1-58	GCA_001876545.1	4598	0.466091	4.36799
B. licheniformis RE1-59	GCA_001876555.1	4567	0.466292	4.3628
B. licheniformis RE1-60	GCA_001876575.1	4614	0.466112	4.36062
B. licheniformis RE1-61	GCA_001876655.1	4591	0.466223	4.36196
B. licheniformis CG-B52	GCA_000477395.1	4760	0.466502	4.30208
B. licheniformis SCDB_14	GCA_002074095.1	4384	0.466843	4.24498
B. licheniformis B4164	GCA_001587355.1	4427	0.471606	4.00594
B. licheniformis VTM3R78	GCA_900110715.1	4158	0.471907	3.995
B. licheniformis V30	GCA_001642595.1	4158	0.47269	4.06399
B. licheniformis B4124	GCA_001925055.1	4576	0.471642	4.11355
B. licheniformis HRBL-15TDI7	GCA_001596055.1	4227	0.468852	4.15686
B. licheniformis B4091	GCA_001587315.1	4678	0.467477	4.19452
B. licheniformis WX-02	GCA_000258125.2	4512	0.470771	4.19049
B. licheniformis 127185_10	GCA_001901555.1	4166	0.472038	4.07655
B. licheniformis B4092	GCA_001587195.1	4960	0.46422	4.42697
B. licheniformis YNP1-TSU	GCA_001914255.1	4302	0.46927	4.1805
B. licheniformis SCK_B11	GCA_002074075.1	4389	0.468499	4.20407
B. licheniformis B4089	GCA_001925025.1	4148	0.466437	3.67641
B. licheniformis ATCC_14580	GCA_000008425.1	4172	0.471571	4.12778
B. licheniformis DSM_13	GCA_000011645.1	4179	0.471775	4.12772
B. licheniformis 127160_7	GCA_001939525.1	4373	0.468413	4.20529
B. licheniformis SRCM100141	GCA_002173675.1	5019	0.464545	4.71622
B. licheniformis SRCM100027	GCA_002174255.1	4568	0.468631	4.33892
B. licheniformis SCCB_37	GCA_002074135.1	4512	0.468742	4.30635
B. licheniformis B4094	GCA_001925115.1	4785	0.467534	4.24244
B. licheniformis VSD4-1	GCA_001831295.1	4056	0.472422	3.89524
B. licheniformis VSD4	GCA_001831295.2	4393	0.471855	4.12086
B. licheniformis GB2	GCA_000952085.1	4066	0.466447	4.2956
B. licheniformis BL1202	GCA_001726125.1	4565	0.46882	4.32282
B. licheniformis LMG_17339	GCA_001507775.1	4324	0.471024	4.0502
B. licheniformis B4121	GCA_001925045.1	4639	0.46839	4.29305
B. paralicheniformis ATCC_12759	GCA_000746885.1	4348	0.46791	4.29064
B. paralicheniformis MKU3	GCA_001969565.1	4430	0.468554	4.27594
B. paralicheniformis F47	GCA_002026335.1	4026	0.471576	3.9491
B. licheniformis B4125	GCA_001925105.1	4632	0.467296	4.26916
B. paralicheniformis BL-09	GCA_000876525.1	4664	0.467265	4.28943
B. licheniformis LMG_6934	GCA_001507765.1	4482	0.467807	4.2426
B. licheniformis B4123	GCA_001925035.1	4859	0.467442	4.44592
B. licheniformis LMG_7559	GCA_001507755.1	4448	0.467494	4.2501
B. paralicheniformis ATCC_9945a	GCA_000408885.1	4225	0.468641	4.27797
B. paralicheniformis NCIMB_8874	GCA_001691515.1	4327	0.468862	4.33876
B. paralicheniformis KJ-16	GCA_001042485.2	4360	0.467884	4.42269
B. licheniformis S127	GCA_001188525.1	4411	0.466112	4.46134
B. paralicheniformis MDJK30	GCA_002068155.1	4253	0.468571	4.25468
B. paralicheniformis 167_2	GCA_001939545.1	4270	0.469612	4.22405
B. licheniformis S_16	GCA_000559105.1	4136	0.466867	4.41692
B. licheniformis 127185_2	GCA_001939535.1	4142	0.449145	4.03916
B. licheniformis SRCM101441	GCA_002173615.1	4387	0.4404	4.10501
B. sonorensis L12	GCA_000342105.1	4659	0.462075	4.49045

## Sheet: strains used in Figure7
Strain name	accession number	ORF number	GC (%)	genome size(Mb)
B. paralicheniformis MDJK30	GCA_002068155.1	4253	0.468571	4.20279
B. subtilis 168	GCF_000009045.1	4174	0.442255	4.07065
B. velezensis FZB42	GCF_000015785.1	3771	0.472748	3.78385
B. subtilis ATCC_13952	GCA_000772125.1	3852	0.467194	3.74298
B. amyloliquefaciens IT-45	GCF_000242855.2	3815	0.474024	3.80157
B. amyloliquefaciens DSM_7	GCF_000196735.1	3991	0.468871	3.84332
B. thuringiensis BGSC_4BD1	GCA_000161675.1	6019	0.355833	6.02753
B. cereu _ATCC_10876	GCF_000743815.1	6217	0.356227	5.78995
B. sonorensis L12	GCA_000342105.1	4659	0.462075	4.49045
B. licheniformis RE1-58	GCA_001876545.1	4598	0.466091	4.31468
B. pumilus SAFR-032	GCA_000017885.4	3715	0.417771	3.57724
B. atrophaeus SRCM101359	GCA_002173495.1	4028	0.441836	4.03705
B. halodurans C-125	GCF_000011145.1	4026	0.44307	4.05783
B. mycoides DSM-2048	GCA_000003925.1	5658	0.360317	5.37063
B. cytotoxicus NVH_391-98	GCA_000017425.1	3844	0.363778	3.95343
B. anthracis A0248	GCA_000022865.1	5291	0.36037	5.31476
B. megaterium DSM_319	GCA_000025805.1	5124	0.391049	4.92212
B. coagulans 2-6	GCA_000217835.1	2971	0.481491	2.9674
B. pseudofirmus OF4	GCA_000005825.2	4335	0.403472	4.10325
B. cellulosilyticus DSM_2522	GCA_000177235.2	4266	0.368657	4.52066
B. selenitireducens MLS10	GCA_000093085.1	3255	0.494293	3.46896
B. flexus KLBMP_4941	GCA_002024265.1	4053	0.385982	3.96327
